# Supplementary material for: Ultrasensitive dual-mode visualization of perchlorate in water, soil and air boosted by close and stable Pt–Pt packing endowed low-energy absorption and emission
Source: Royal Society of Chemistry journal article supplement (doi:10.1039/d2ta00843b), 2022-01-01
Supplement: d2ta00843b1.pdf [file d2ta00843b1.pdf]

Supporting Information for

## **Ultrasensitive Dual-mode Visualization of Perchlorate in Water, Soil and**

## **Air Boosted by Close and Stable Pt-Pt Packing Endowed Low-energy**

### **Absorption and Emission**

Zhen Su,<sup>ab</sup> Yushu Li,<sup>\*a</sup> Jiguang Li,<sup>ab</sup> Kun Li,<sup>\*c</sup> and Xincun Dou<sup>\*ab</sup>

<sup>a</sup> Xinjiang Key Laboratory of Explosives Safety Science, Xinjiang Technical Institute of Physics & Chemistry; Key Laboratory of Functional Materials and Devices for Special Environments, Chinese Academy of Sciences, Urumqi 830011, China

<sup>b</sup> Center of Materials Science and Optoelectronics Engineering, University of Chinese Academy of Sciences, Beijing 100049, China

<sup>c</sup> Shanxi Key Laboratory of Metal Forming Theory and Technology, School of Material Science and Engineering, Taiyuan University of Science and Technology, Taiyuan 030024, China.

\* Corresponding authors. E-mail: liys@ms.xjb.ac.cn (Yushu Li); likun@tyust.edu.cn (Kun Li); xcdou@ms.xjb.ac.cn (Xincun Dou)

## Supplementary Figures

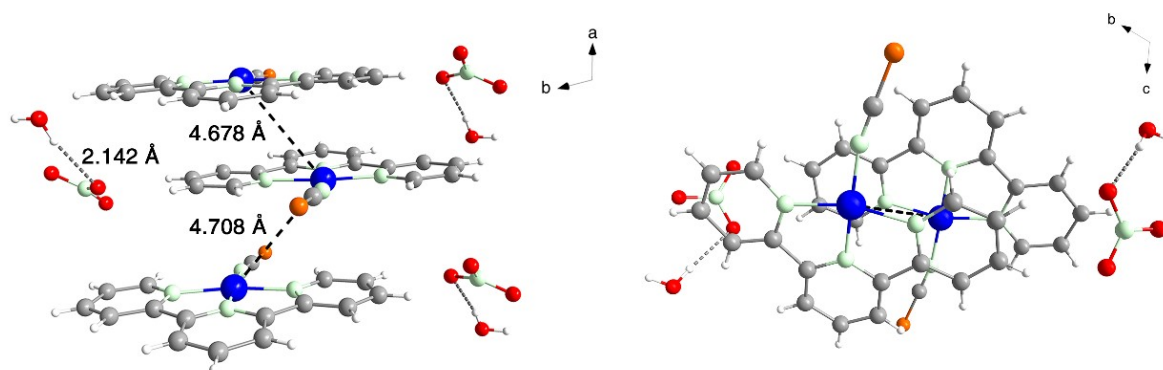

**Fig. S1.** Single crystal structure of [Pt(tpy)NCS]·NO<sub>3</sub>·H<sub>2</sub>O from side view (left) and top view (right).

**Discussion:** As determined by X-ray crystallography, its crystal structure belongs to *P-1* space group, with 1D columnar stack of planar molecules extending parallel to the crystallographic *a*-axis. Due to the hydrophilicity, NO<sub>3</sub><sup>-</sup> bonds a solvated water-molecule through H-bonds (bond length for HO-H···ONO<sub>2</sub><sup>-</sup> is 2.142 Å). Adjacent Pt-centers adopt a zig-zag arrangement with a Pt-Pt-Pt angle of 103.36°. Individual molecules are rotated with respect to their neighbors, with a (SCN)-Pt-Pt-(NCS) torsion angle of 180.00° and almost no stacking of the aromatic terpyridyl units. Stacked Pt atoms are separated by an alternate Pt-Pt distance of 4.678/4.708 Å, indicating the absence of metal-metal interaction.

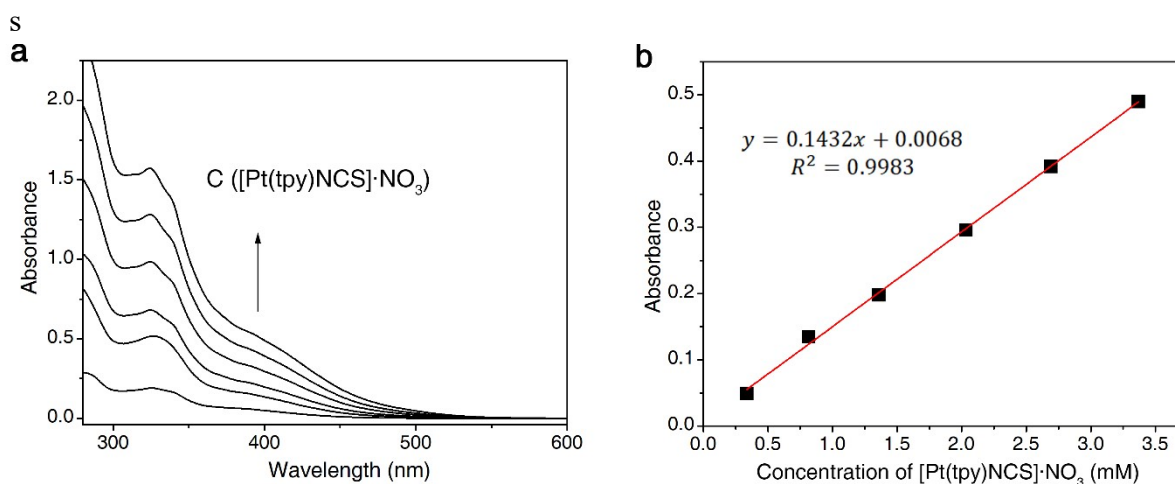

**Fig. S2.** a) UV-vis absorption spectra of [Pt(tpy)NCS]·NO<sub>3</sub> aqueous solution in the concentration range of 0.3 mM to 3.5 mM, tested with the optical path length of 1 mm. b) The linear fitting of absorbance at 400 nm as a function of [Pt(tpy)NCS]·NO<sub>3</sub> concentration.

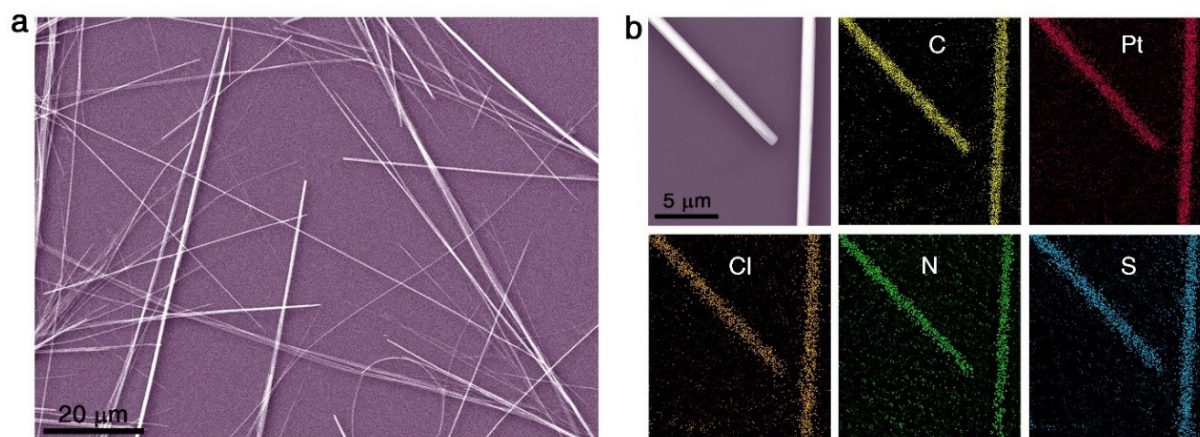

**Fig. S3.** a) SEM image of generated 1D aggregates of  $[\text{Pt}(\text{terpy})\text{NCS}]\cdot\text{ClO}_4\cdot\text{H}_2\text{O}$ . b) EDS mapping of the 1D aggregates.

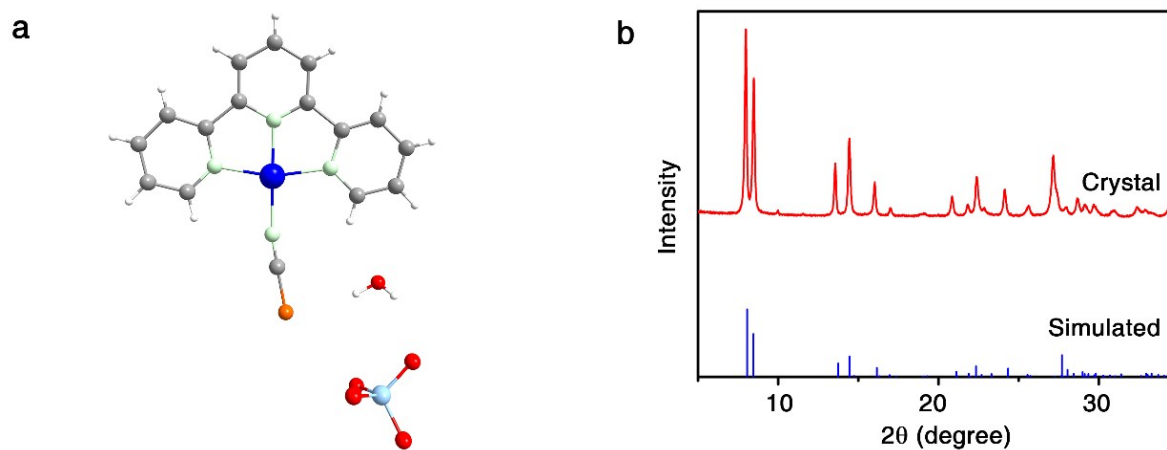

**Fig. S4.** a) Atomic arrangement in the asymmetric unit of the hydrated single-crystal structure of  $[\text{Pt}(\text{tpy})\text{NCS}]\cdot\text{ClO}_4\cdot\text{H}_2\text{O}$ . b) Simulated XPRD pattern with the experimental pattern of powdered sample.

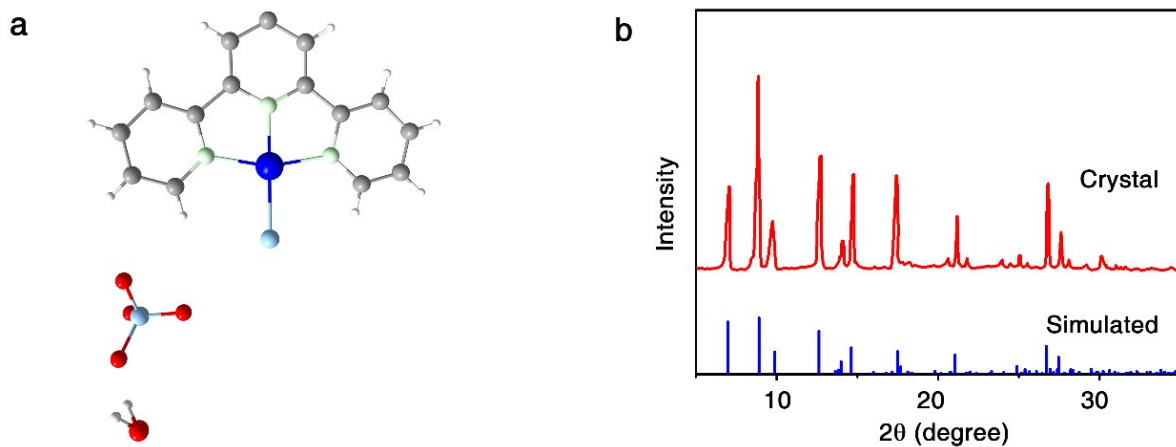

**Fig. S5.** a) Atomic arrangement in the asymmetric unit of the hydrated single-crystal structure of  $[\text{Pt}(\text{tpy})\text{Cl}]\cdot\text{ClO}_4\cdot\text{H}_2\text{O}$ . b) Simulated XPRD pattern with the experimental pattern of powdered sample.

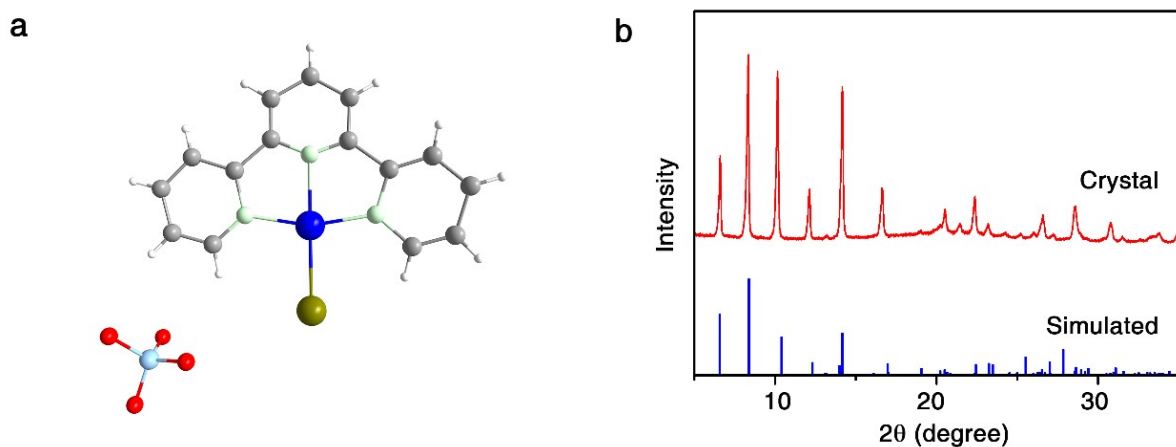

**Fig. S6.** a) Atomic arrangement in the asymmetric unit of the single-crystal structure of  $[\text{Pt}(\text{tpy})\text{I}]\cdot\text{ClO}_4$ . b) Simulated XPRD pattern with the experimental pattern of powdered sample.

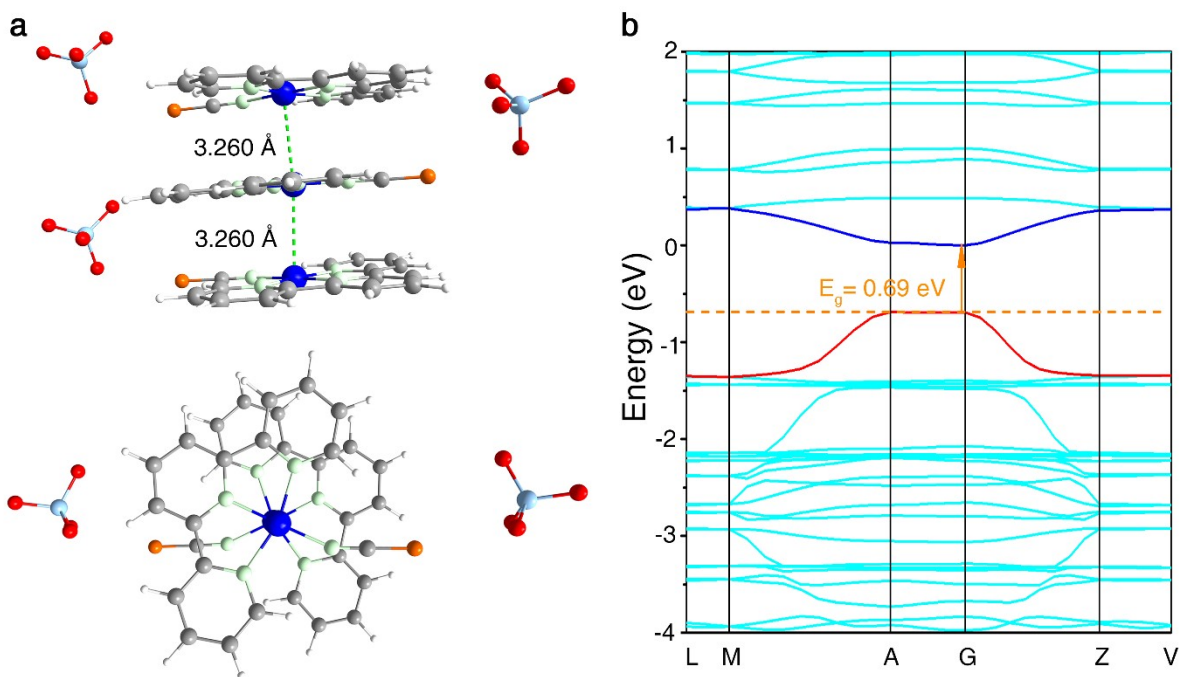

**Fig. S7.** a) Simulated crystal structure of dehydrated compound of [Pt(tpy)NCS]·ClO<sub>4</sub>. b) Calculated band structure for the structure of [Pt(tpy)NCS]·ClO<sub>4</sub>.

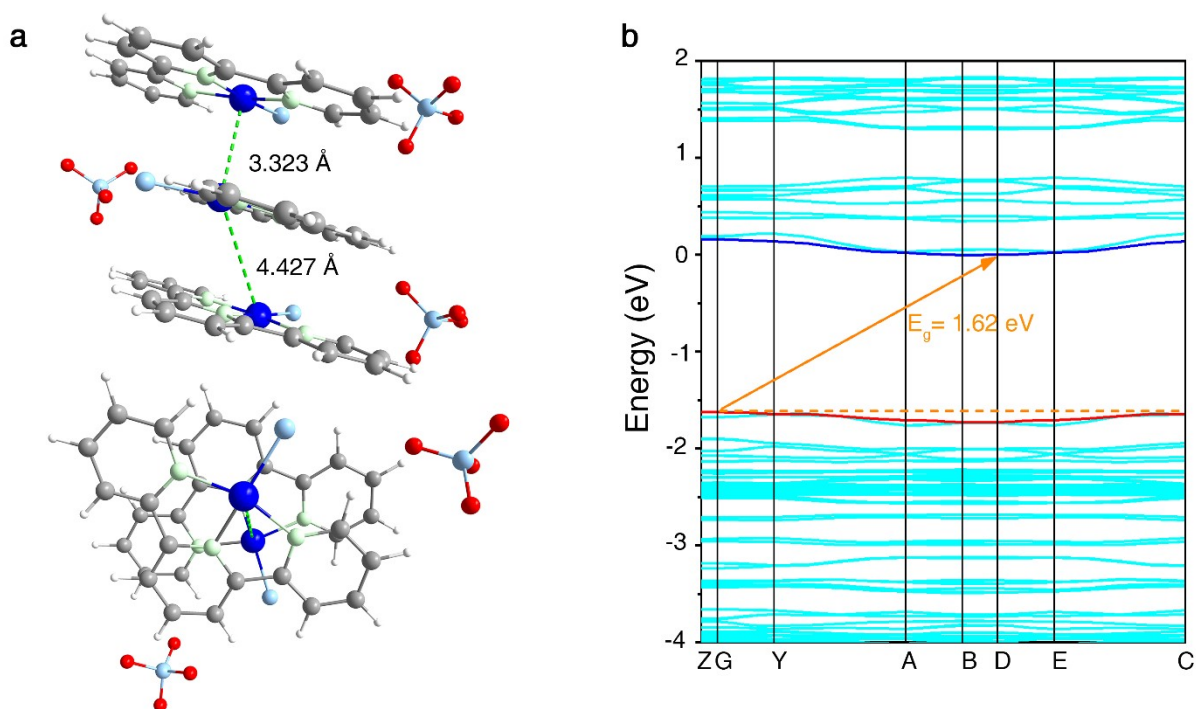

**Fig. S8.** a) Simulated crystal structure of dehydrated compound of [Pt(tpy)Cl]·ClO<sub>4</sub>. b) Calculated band structure for the structure of [Pt(tpy)Cl]·ClO<sub>4</sub>.

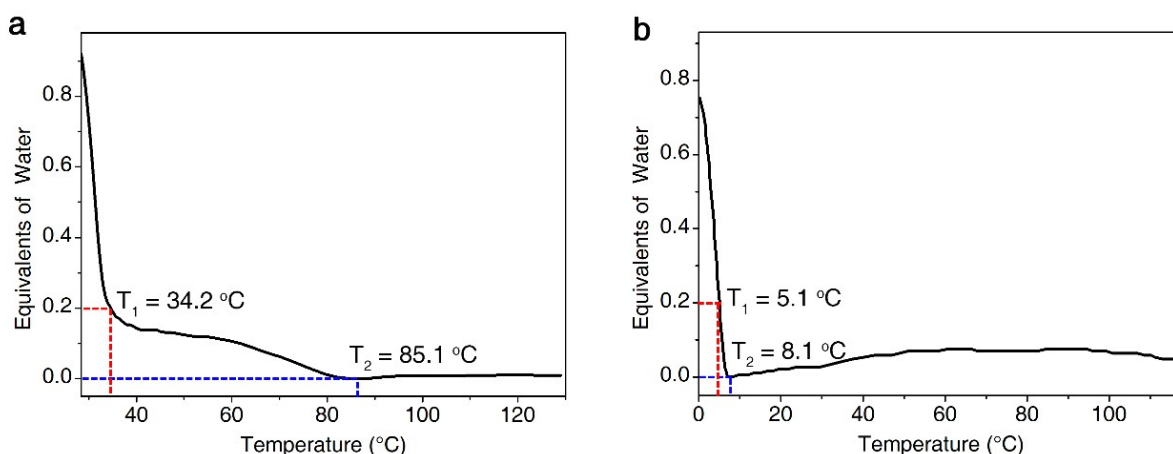

**Fig. S9.** a) Thermogravimetric analysis for  $[\text{Pt}(\text{tpy})\text{NCS}]\cdot\text{ClO}_4\cdot\text{H}_2\text{O}$  at the heating rate as low as  $1\text{ }^\circ\text{C min}^{-1}$ . b) Thermogravimetric analysis for  $[\text{Pt}(\text{tpy})\text{Cl}]\cdot\text{ClO}_4\cdot\text{H}_2\text{O}$  at the heating rate as low as  $1\text{ }^\circ\text{C min}^{-1}$ , reported by previous study.<sup>1</sup>

**Discussion:** As shown in Fig. S9, the loss of crystal water in complex  $[\text{Pt}(\text{tpy})\text{NCS}]\cdot\text{ClO}_4\cdot\text{H}_2\text{O}$  is much slower than in  $[\text{Pt}(\text{tpy})\text{Cl}]\cdot\text{ClO}_4\cdot\text{H}_2\text{O}$  compound. For  $[\text{Pt}(\text{tpy})\text{NCS}]\cdot\text{ClO}_4\cdot\text{H}_2\text{O}$ , the temperatures corresponding to 0.2 and 0 equivalents of water are  $34.2\text{ }^\circ\text{C}$  and  $85.1\text{ }^\circ\text{C}$ , respectively. As comparison, for  $[\text{Pt}(\text{tpy})\text{Cl}]\cdot\text{ClO}_4\cdot\text{H}_2\text{O}$ , the temperatures corresponding to 0.2 and 0 equivalents of water are much lower ( $5.1\text{ }^\circ\text{C}$  and  $8.1\text{ }^\circ\text{C}$ , respectively). This indicates that the solvated water molecule in  $[\text{Pt}(\text{tpy})\text{Cl}]\cdot\text{ClO}_4\cdot\text{H}_2\text{O}$  is less stable than that in  $[\text{Pt}(\text{tpy})\text{NCS}]\cdot\text{ClO}_4\cdot\text{H}_2\text{O}$ .

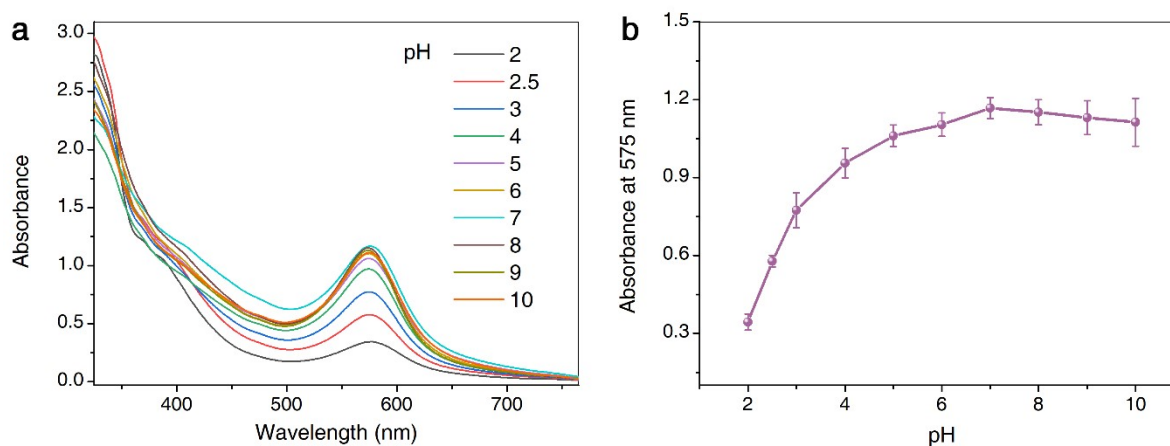

**Fig. S10.** a) UV-vis absorption changes at different initial pH of  $[\text{Pt}(\text{tpy})\text{NCS}]\cdot\text{NO}_3$  aqueous solution ( $0.6\text{ mM}$ ) after adding perchlorate ( $0.5\text{ mM}$ ). b) Corresponding absorbance at  $575\text{ nm}$  under different pH.

**Discussion:** As shown in Fig. S10, the characteristic absorption peak at  $575\text{ nm}$  gradually enhanced with initial pH value raising from 2 to 6, which then increased little with further raise of pH, demonstrating that the neutral or alkaline environment is conducive to the formation of  $[\text{Pt}(\text{tpy})\text{NCS}]\cdot\text{ClO}_4\cdot\text{H}_2\text{O}$  aggregate and thus beneficial to the sensing application.

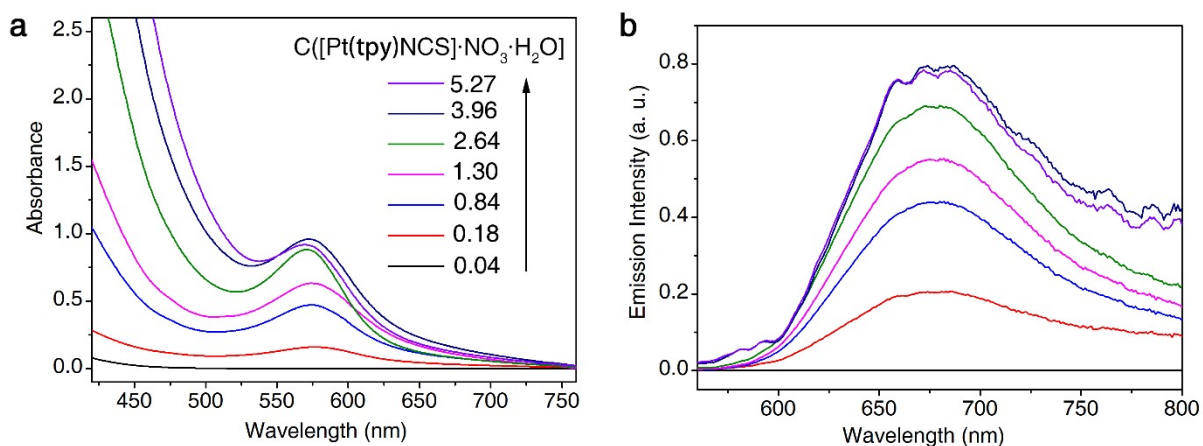

**Fig. S11.** a) UV-vis absorption changes by adding 0.2 mM perchlorate into [Pt(tpy)NCS]·NO<sub>3</sub>·H<sub>2</sub>O aqueous solution of different concentration. b) Corresponding emission spectra.

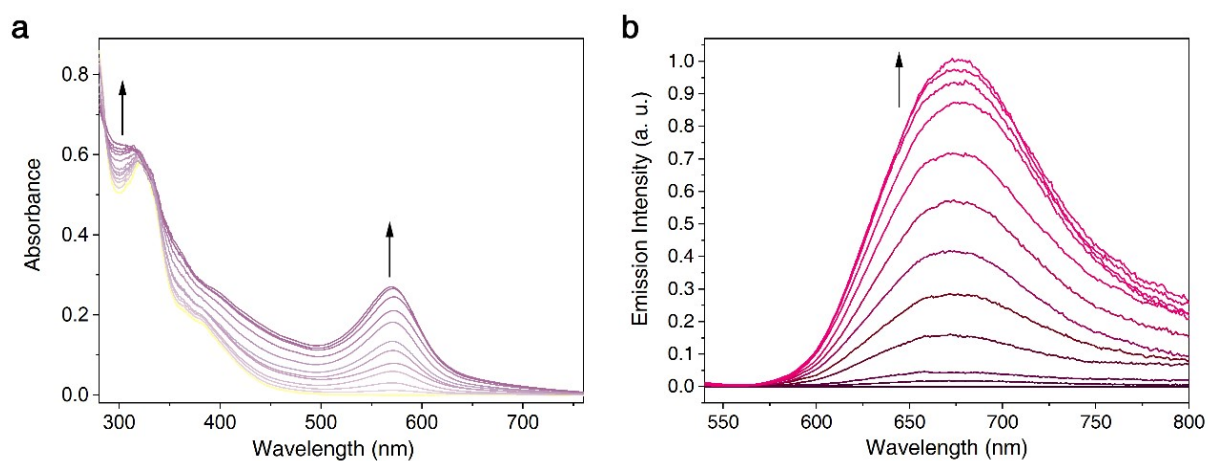

**Fig. S12.** a) UV-vis absorption changes of [Pt(tpy)NCS]·NO<sub>3</sub> aqueous solution (0.04 mM) with increasing chlorate content from 0 to 0.8 mM. b) Corresponding emission enhancement with increasing perchlorate content, excited at 527 nm.

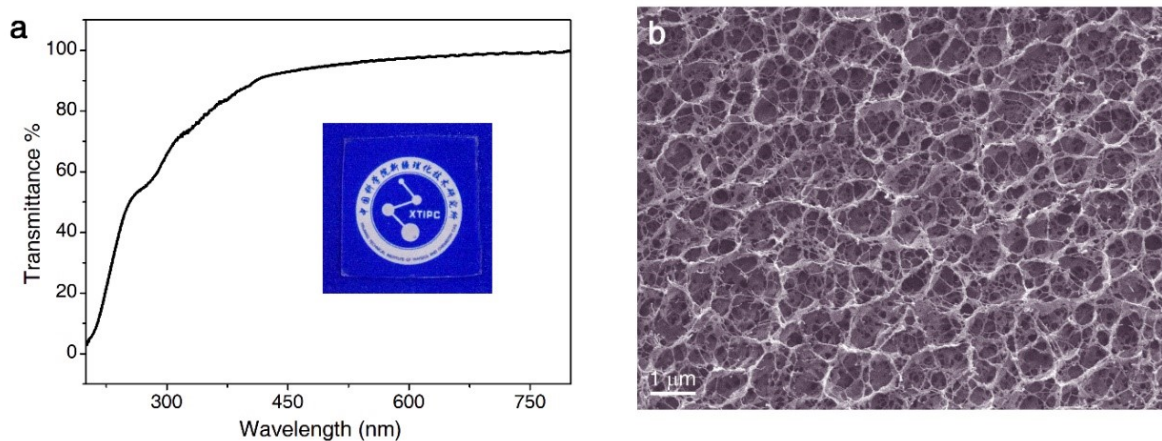

**Fig. S13.** a) SEM image of prepared PVA hydrogel. b) Optical transmittance of prepared PVA hydrogel (polymer concentration is 0.15 g/mL, 1 mm thick). Inset: The corresponding photograph.

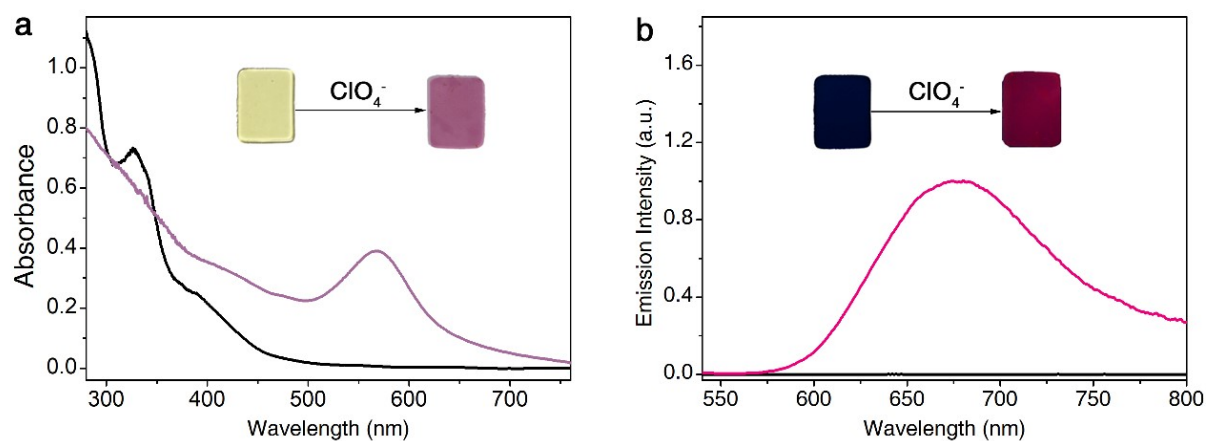

**Fig. S14.** a) UV-vis absorption spectra of [Pt(tpy)NCS]-PVA before and after reacting with  $\text{ClO}_4^-$  in aqueous solution. Inset: The corresponding photographs under sunlight. b) Emission spectra of [Pt(tpy)NCS]-PVA before and after reacting with  $\text{ClO}_4^-$  in aqueous solution. Inset: The corresponding photographs under 365 nm UV light.



## Supplementary Tables

**Table S1.** Crystal data and structure refinement for [Pt(tpy)NCS]·NO<sub>3</sub>·H<sub>2</sub>O.

| Compound                                    | [Pt(tpy)NCS]·NO <sub>3</sub> ·H <sub>2</sub> O                                     |
|---------------------------------------------|------------------------------------------------------------------------------------|
| Empirical formula                           | C <sub>16</sub> H <sub>11</sub> N <sub>5</sub> SO <sub>3</sub> Pt·H <sub>2</sub> O |
| Formula weight                              | 566.46                                                                             |
| Temperature/K                               | 100.00(10)                                                                         |
| Crystal system                              | triclinic                                                                          |
| Space group                                 | P-1                                                                                |
| a/Å                                         | 7.3640(4)                                                                          |
| b/Å                                         | 11.3278(8)                                                                         |
| c/Å                                         | 11.7118(10)                                                                        |
| α/°                                         | 111.899(7)                                                                         |
| β/°                                         | 106.700(6)                                                                         |
| γ/°                                         | 97.274(5)                                                                          |
| Volume/Å <sup>3</sup>                       | 837.67(11)                                                                         |
| Z                                           | 2                                                                                  |
| ρ <sub>calc</sub> /g/cm <sup>3</sup>        | 2.246                                                                              |
| μ/mm <sup>-1</sup>                          | 8.536                                                                              |
| F(000)                                      | 540.0                                                                              |
| Crystal size/mm <sup>3</sup>                | 0.11 × 0.1 × 0.08                                                                  |
| Radiation                                   | MoKα (λ = 0.71073)                                                                 |
| 2θ range for data collection/°              | 4.016 to 49.998                                                                    |
| Index ranges                                | -8 ≤ h ≤ 8, -13 ≤ k ≤ 13, -13 ≤ l ≤ 13                                             |
| Reflections collected                       | 9179                                                                               |
| Independent reflections                     | 2952 [R <sub>int</sub> = 0.0587, R <sub>sigma</sub> = 0.0635]                      |
| Data/restraints/parameters                  | 2952/0/247                                                                         |
| Goodness-of-fit on F <sup>2</sup>           | 1.038                                                                              |
| Final R indexes [I ≥ 2σ (I)]                | R <sub>1</sub> = 0.0345, wR <sub>2</sub> = 0.0759                                  |
| Final R indexes [all data]                  | R <sub>1</sub> = 0.0390, wR <sub>2</sub> = 0.0795                                  |
| Largest diff. peak/hole / e Å <sup>-3</sup> | 2.02/-2.17                                                                         |

The obtained single crystals have been deposited at the Cambridge Crystallographic Data Centre and allocated the deposition number: [Pt(tpy)NCS]·NO<sub>3</sub>·H<sub>2</sub>O (1982814).

**Table S2.** Crystal data and structure refinement for [Pt(tpy)L]·ClO<sub>4</sub>·nH<sub>2</sub>O (L = NCS<sup>-</sup>, Cl<sup>-</sup>, I<sup>-</sup>; n = 0 or 1).

| Compound                                    | [Pt(tpy)NCS]·ClO <sub>4</sub> ·H <sub>2</sub> O                                      | [Pt(tpy)Cl]·ClO <sub>4</sub> ·H <sub>2</sub> O <sup>[a]</sup>                                     | [Pt(tpy)I]·ClO <sub>4</sub>                                         |
|---------------------------------------------|--------------------------------------------------------------------------------------|---------------------------------------------------------------------------------------------------|---------------------------------------------------------------------|
| Empirical formula                           | C <sub>16</sub> H <sub>11</sub> N <sub>4</sub> SClO <sub>4</sub> Pt·H <sub>2</sub> O | C <sub>15</sub> H <sub>11</sub> N <sub>3</sub> Cl <sub>2</sub> O <sub>4</sub> Pt·H <sub>2</sub> O | C <sub>15</sub> H <sub>11</sub> N <sub>3</sub> IClO <sub>4</sub> Pt |
| Formula weight                              | 601.89                                                                               | 581.27                                                                                            | 654.71                                                              |
| Temperature/K                               | 100.00(10)                                                                           | 150(2)                                                                                            | 100.00(11)                                                          |
| Crystal system                              | monoclinic                                                                           | triclinic                                                                                         | triclinic                                                           |
| Space group                                 | Cc                                                                                   | P-1                                                                                               | P-1                                                                 |
| a/Å                                         | 12.3564                                                                              | 6.6281                                                                                            | 6.9145                                                              |
| b/Å                                         | 12.3564                                                                              | 10.2133                                                                                           | 10.908                                                              |
| c/Å                                         | 6.5138                                                                               | 13.3506                                                                                           | 13.387                                                              |
| α/°                                         | 96.7355                                                                              | 104.376                                                                                           | 110.985                                                             |
| β/°                                         | 96.7355                                                                              | 103.628                                                                                           | 101.473                                                             |
| γ/°                                         | 115.439                                                                              | 90.548                                                                                            | 94.8810                                                             |
| Volume/Å <sup>3</sup>                       | 876.181                                                                              | 848.59                                                                                            | 910.305                                                             |
| Z                                           | 2                                                                                    | 2                                                                                                 | 2                                                                   |
| ρ <sub>calc</sub> /g/cm <sup>3</sup>        | 2.281                                                                                | 2.275                                                                                             | 2.389                                                               |
| μ/mm <sup>-1</sup>                          | 17.866                                                                               | 18.684                                                                                            | 29.317                                                              |
| F(000)                                      | 1144.0                                                                               | 552                                                                                               | 604.0                                                               |
| Crystal size/mm <sup>3</sup>                | 0.12 × 0.1 × 0.08                                                                    | 0.18 × 0.03 × 0.02                                                                                | 0.12 × 0.11 × 0.1                                                   |
| Radiation                                   | CuKα (λ = 1.54184)                                                                   | -                                                                                                 | CuKα (λ = 1.54184)                                                  |
| 2 range for data collection/°               | 8.066 to 147.632                                                                     | 3.53 to 67.47                                                                                     | 7.298 to 147.23                                                     |
| Index ranges                                | -16 ≤ h ≤ 16, -23 ≤ k ≤ 25, -4 ≤ l ≤ 7                                               | -7 ≤ h ≤ , -12 ≤ k ≤ 11, -15 ≤ l ≤ 15                                                             | -8 ≤ h ≤ 4, -13 ≤ k ≤ 13, -15 ≤ l ≤ 16                              |
| Reflections collected                       | 3325                                                                                 | 6610                                                                                              | 5874                                                                |
| Independent reflections                     | 2055 [R <sub>int</sub> = 0.0359, R <sub>sigma</sub> = 0.0464]                        | 2853 [R <sub>int</sub> = 0.0335]                                                                  | 3550 [R <sub>int</sub> = 0.0840, R <sub>sigma</sub> = 0.1138]       |
| Data/restraints/parameters                  | 2055/77/253                                                                          | 2853/0/235                                                                                        | 3550/39/226                                                         |
| Goodness-of-fit on F <sup>2</sup>           | 1.049                                                                                | 1.011                                                                                             | 1.021                                                               |
| Final R indexes [I ≥ 2σ (I)]                | R <sub>1</sub> = 0.0402, wR <sub>2</sub> = 0.1039                                    | R <sub>1</sub> = 0.0348, wR <sub>2</sub> = 0.0821                                                 | R <sub>1</sub> = 0.0837, wR <sub>2</sub> = 0.1898                   |
| Final R indexes [all data]                  | R <sub>1</sub> = 0.0412, wR <sub>2</sub> = 0.1055                                    | R <sub>1</sub> = 0.0401, wR <sub>2</sub> = 0.0843                                                 | R <sub>1</sub> = 0.1033, wR <sub>2</sub> = 0.2243                   |
| Largest diff. peak/hole / e Å <sup>-3</sup> | 2.89/-3.04                                                                           | 1.939/-1.109                                                                                      | 2.46/-2.10                                                          |

[a] Its crystal data was obtained from previous study.<sup>2</sup>

The obtained single crystals have been deposited at the Cambridge Crystallographic Data Centre and allocated the deposition number: [Pt(tpy)NCS]·ClO<sub>4</sub>·H<sub>2</sub>O (1982809) and [Pt(tpy)I]·ClO<sub>4</sub> (1982810).

**Table S3.** Photophysical data of [Pt(terpy)L]·ClO<sub>4</sub>·nH<sub>2</sub>O (L = NCS, Cl and I, n = 0 or 1) in solid state.

| Complex                                          | Medium (T/K) | $\lambda(\text{Absorb})_{\text{max}}/\text{nm}$ | $\lambda(\text{Emiss})/\text{nm}$ ( $\lambda_{\text{Ex}}/\text{nm}$ ) | Emission lifetime, $\tau$ ( $\mu\text{s}$ ) | Luminescence quantum yield (%) |
|--------------------------------------------------|--------------|-------------------------------------------------|-----------------------------------------------------------------------|---------------------------------------------|--------------------------------|
| [Pt(terpy)NCS]ClO <sub>4</sub> ·H <sub>2</sub> O | Solid (298)  | 577                                             | 677 (295-520)                                                         | 15.32                                       | 7.78                           |
| [Pt(terpy)Cl]ClO <sub>4</sub> ·H <sub>2</sub> O  | Solid (298)  | 535                                             | 658 (295-520)                                                         | 14.20                                       | 23.60                          |
| [Pt(terpy)I]ClO <sub>4</sub>                     | Solid (298)  | 482                                             | 596 (295-520)                                                         | 6.06                                        | 0.91                           |

**Table S4.** Comparison of the experimental and computational results of the structure parameters of [Pt(tpy)L]·ClO<sub>4</sub>·nH<sub>2</sub>O (L = NCS<sup>-</sup>, Cl<sup>-</sup> and I<sup>-</sup>; n = 0 or 1).

| Compound                                        | Parameters               | Experiment | DFT-D3 | DFT-D3-BJ | VDW-without |
|-------------------------------------------------|--------------------------|------------|--------|-----------|-------------|
| [Pt(tpy)NCS]·ClO <sub>4</sub> ·H <sub>2</sub> O | a (Å)                    | 12.36      | 12.36  | 12.36     | 12.56       |
|                                                 | b (Å)                    | 12.36      | 12.36  | 12.36     | 12.56       |
|                                                 | c (Å)                    | 6.51       | 6.56   | 6.49      | 7.30        |
|                                                 | alpha                    | 96.74      | 96.60  | 96.60     | 96.53       |
|                                                 | beta                     | 96.74      | 96.60  | 96.60     | 96.53       |
|                                                 | gamma                    | 115.44     | 115.73 | 115.70    | 115.56      |
|                                                 | Volume (Å <sup>3</sup> ) | 876.18     | 881.85 | 872.89    | 1015.40     |
|                                                 | Pt-Pt I length (Å)       | 3.27       | 3.29   | 3.26      | 3.65        |
|                                                 | Pt-Pt II length (Å)      | 3.27       | 3.29   | 3.26      | 3.65        |
| [Pt(tpy)Cl]·ClO <sub>4</sub> ·H <sub>2</sub> O  | a (Å)                    | 6.67       | 6.63   | 6.58      | 7.16        |
|                                                 | b (Å)                    | 10.24      | 10.15  | 10.15     | 10.33       |
|                                                 | c (Å)                    | 13.39      | 13.34  | 13.33     | 13.71       |
|                                                 | alpha                    | 103.82     | 103.48 | 103.46    | 104.25      |
|                                                 | beta                     | 102.81     | 104.18 | 103.15    | 100.98      |
|                                                 | gamma                    | 90.49      | 91.27  | 91.05     | 90.74       |
|                                                 | Volume (Å <sup>3</sup> ) | 864.14     | 843.77 | 840.67    | 962.66      |
|                                                 | Pt-Pt I length (Å)       | 3.33       | 3.29   | 3.28      | 3.59        |
|                                                 | Pt-Pt II length (Å)      | 3.38       | 3.37   | 3.33      | 3.61        |
| [Pt(tpy)I]·ClO <sub>4</sub> ·H <sub>2</sub> O   | a (Å)                    | 6.91       | 7.12   | 7.06      | 7.77        |
|                                                 | b (Å)                    | 10.91      | 10.93  | 10.90     | 11.15       |
|                                                 | c (Å)                    | 13.39      | 13.33  | 13.33     | 13.56       |
|                                                 | alpha                    | 110.99     | 112.54 | 112.36    | 112.27      |
|                                                 | beta                     | 101.47     | 102.50 | 102.71    | 101.58      |
|                                                 | gamma                    | 94.88      | 97.43  | 97.25     | 93.46       |
|                                                 | Volume (Å <sup>3</sup> ) | 910.31     | 908.80 | 901.70    | 1052.55     |
|                                                 | Pt-Pt I length (Å)       | 3.44       | 3.60   | 3.49      | 3.89        |
|                                                 | Pt-Pt II length (Å)      | 3.67       | 3.95   | 3.64      | 4.08        |

Each crystal supercell consists of two identical molecules, but their positions of the two layers within the crystal are not equivalent. The shorter Pt-Pt distance is called “Pt-Pt I”, while the longer one is called “Pt-Pt II”. For each complex, three simulation schemes including DFT-D3 dispersion correction (DFT-D3), DFT-D3 with Becke-Johnson damping (DFT-D3-BJ), and simulation without dispersion correction (VDW-without) were performed to find the best scheme consisting with the experiment.

As is shown in Table S4, the structure parameters calculated without dispersion correction are quite different from those of the experiments. In all three types of crystals, the volume of primitive cell has an error of more than 10 %. When the dispersion correction is used in the calculation, the corresponding computational results have been greatly improved, and the error between the simulation results and the experimental results can be reduced to less than 1 %. This fact indicates that the non-covalent interactions of  $\pi$ - $\pi$  stacking interaction and hydrogen bonding interaction actually play a key role in the crystal formation process. Further comparing the results of DFT-D3 and DFT-D3-BJ schemes, most of them are not much different except the Pt-Pt distance is better with the DFT-D3-BJ scheme in accordance with the experimental results. As the electrical structure of the layered crystals is quite sensitive to Pt-Pt distance, we believe that the calculation method with DFT-D3-BJ is more reliable in exploring the electrical property of the studied crystals. In order to maintain consistency, DFT-D3-BJ method has been used both in calculating electronic structure and optical properties of the different complexes.

**Table S5.** Calculation on the through-water binding energy of  $[\text{Pt}(\text{tpy})\text{L}]^+$  ( $\text{L} = \text{NCS}^-$  and  $\text{Cl}^-$ ) to  $\text{ClO}_4^-$ .

| L              | $E_L$     | $E_{L-\text{H}_2\text{O}}$ | $E_{\text{H}_2\text{O}}$ | $E_f$  |
|----------------|-----------|----------------------------|--------------------------|--------|
| $\text{NCS}^-$ | -537.2955 | -507.4565                  | -14.2435                 | -0.66  |
| $\text{Cl}^-$  | -499.3235 | -470.8447                  | -14.2435                 | 0.0041 |

Both the complex  $[\text{Pt}(\text{tpy})\text{NCS}]\cdot\text{ClO}_4\cdot\text{H}_2\text{O}$  and  $[\text{Pt}(\text{tpy})\text{Cl}]\cdot\text{ClO}_4\cdot\text{H}_2\text{O}$  contain two water molecules in the experimental structure. The binding energy  $E_f$  is defined as:

$$E_f = \frac{1}{2}[E_L - (E_{L-\text{H}_2\text{O}} + 2E_{\text{H}_2\text{O}})], \quad (1)$$

where  $E_L$  is total energy of the dehydrated form  $[\text{Pt}(\text{tpy})\text{L}]\cdot\text{ClO}_4$ ,  $E_{L-\text{H}_2\text{O}}$  is total energy of the hydrated form  $[\text{Pt}(\text{tpy})\text{L}]\cdot\text{ClO}_4\cdot\text{H}_2\text{O}$ ,  $E_{\text{H}_2\text{O}}$  is the total energy of water molecules. The calculation parameters are the same to the above parameters and a damped dispersion correction is implemented as well. In the calculation of  $E_{\text{H}_2\text{O}}$ , the  $20 \text{ \AA} \times 20 \text{ \AA} \times 20 \text{ \AA}$  cubic cell is selected to ensure the accuracy of the calculations.

**Table S6.** Comparison of the computational results of the structure parameters of the hydrated form  $[\text{Pt}(\text{tpy})\text{L}]\cdot\text{ClO}_4\cdot\text{H}_2\text{O}$  and dehydrated form  $[\text{Pt}(\text{tpy})\text{L}]\cdot\text{ClO}_4$  ( $\text{L} = \text{NCS}^-$  and  $\text{Cl}^-$ ) by DFT-D3-BJ method.

| Parameters               | $[\text{Pt}(\text{tpy})\text{NCS}]\cdot\text{ClO}_4$ | $[\text{Pt}(\text{tpy})\text{NCS}]\cdot\text{ClO}_4\cdot\text{H}_2\text{O}$ |
|--------------------------|------------------------------------------------------|-----------------------------------------------------------------------------|
| a (Å)                    | 12.18                                                | 12.36                                                                       |
| b (Å)                    | 12.18                                                | 12.36                                                                       |
| c (Å)                    | 6.51                                                 | 6.49                                                                        |
| alpha                    | 97.47                                                | 96.60                                                                       |
| beta                     | 97.47                                                | 96.60                                                                       |
| gamma                    | 115.34                                               | 115.70                                                                      |
| Volume (Å <sup>3</sup> ) | 847.27                                               | 872.89                                                                      |
| Pt-Pt I length (Å)       | 3.26                                                 | 3.26                                                                        |
| Pt-Pt II length (Å)      | 3.26                                                 | 3.26                                                                        |
|                          | $[\text{Pt}(\text{tpy})\text{Cl}]\cdot\text{ClO}_4$  | $[\text{Pt}(\text{tpy})\text{Cl}]\cdot\text{ClO}_4\cdot\text{H}_2\text{O}$  |
| a (Å)                    | 7.17                                                 | 6.58                                                                        |
| b (Å)                    | 16.59                                                | 10.15                                                                       |
| c (Å)                    | 26.78                                                | 13.33                                                                       |
| alpha                    | 90.00                                                | 103.46                                                                      |
| beta                     | 91.89                                                | 103.15                                                                      |
| gamma                    | 90.00                                                | 91.05                                                                       |
| Volume (Å <sup>3</sup> ) | 3182.22                                              | 840.67                                                                      |
| Pt-Pt I length (Å)       | 3.32                                                 | 3.28                                                                        |
| Pt-Pt II length (Å)      | 4.43                                                 | 3.33                                                                        |

**Table S7.** Comparison of [Pt(tpy)NCS]-PVA hydrogel sensing platform with other methods.

| Detection method<br>(Readout mode)                         | Material                                             | Cost      | Onsite detection | Response rate | Pre-treatment | Detection limit for perchlorate |                         | Ref.      |
|------------------------------------------------------------|------------------------------------------------------|-----------|------------------|---------------|---------------|---------------------------------|-------------------------|-----------|
|                                                            |                                                      |           |                  |               |               | Solution                        | Solid                   |           |
| Fluorescence (Single-mode)                                 | Perylenediimide                                      | Cheap     | Yes              | Fast          | No            | $6 \times 10^{-8}$ M            | -                       | 3         |
| Fluorescence (Dual-mode)                                   | Rhodamine                                            | Cheap     | Yes              | Fast          | No            | $1 \times 10^{-7}$ M            | -                       | 4         |
| Bioassay (Single-mode)                                     | Perchlorate reductase                                | Cheap     | Yes              | Slow          | No            | $2 \times 10^{-8}$ M            | -                       | 5         |
| Fluorescence (Single-mode)                                 | Coordination polymer                                 | Cheap     | Yes              | Fast          | No            | $1.7 \times 10^{-7}$ M          | -                       | 6         |
| Fluorescence (Single-mode)                                 | Tetraphenylethene-based compound                     | Cheap     | Yes              | Fast          | No            | $3.8 \times 10^{-7}$ M          | -                       | 7         |
| Luminescence (Single-mode)                                 | Ir(III) complex                                      | Cheap     | Yes              | Fast          | No            | $5 \times 10^{-7}$ M            | -                       | 8         |
| Inductively coupled plasma mass spectrometry (Single-mode) | -                                                    | Expensive | No               | Medium        | Yes           | $0.3 \times 10^{-8}$ M          | -                       | 9         |
| Capillary electrophoresis (Single-mode)                    | -                                                    | Expensive | No               | Slow          | Yes           | $1.8 \times 10^{-7}$ M          | -                       | 10        |
| Surface-enhanced Raman spectroscopy (Single-mode)          | Diethyldithiocarbamate-modified Ag nanowire membrane | Expensive | No               | Medium        | Yes           | -                               | $2.0 \times 10^{-9}$ g  | 11        |
| Ion mobility spectrometry (Single-mode)                    | -                                                    | Expensive | Yes              | Fast          | Yes           | -                               | $6.3 \times 10^{-9}$ g  | 12        |
| Electrospray ionization mass spectrometry (Single-mode)    | -                                                    | Expensive | No               | Medium        | Yes           | -                               | $1.0 \times 10^{-10}$ g | 13        |
| Colorimetry and luminescence (Dual-mode)                   | [Pt(tpy)NCS]-PVA hydrogel                            | Cheap     | Yes              | Fast          | No            | $1.4 \times 10^{-8}$ M          | $2 \times 10^{-17}$ g   | This work |

## References

1. S. D. Taylor, A. E. Norton, R. T. Hart, Jr., M. K. Abdolmaleki, J. A. Krause and W. B. Connick, *Chem. Commun.*, 2013, **49**, 9161.
2. S. D. Taylor, W. Howard, N. Kaval, R. Hart, J. A. Krause and W. B. Connick, *Chem. Commun.*, 2010, **46**, 1070.
3. P. Singh, L. S. Mittal, V. Vanita, R. Kumar, G. Bhargava, A. Walia and S. Kumar, *Chem. Commun.*, 2014, **50**, 13994.
4. A. Sahana, A. Banerjee, S. Lohar, A. Chottapadhyay, S. K. Mukhopadhyay and D. Das, *RSC Advances*, 2013, **3**, 14044.

5. M. Heinnickel, S. C. Smith, J. Koo, S. M. O'Connor and J. D. Coates, *Environ. Sci. Technol.*, 2011, **45**, 2958-2964.
6. X. Zheng, R. Fan, K. Xing, K. Zhu, P. Wang and Y. Yang, *Chem. Eng. J.*, 2020, **380**.
7. N. Li, Y. Y. Liu, Y. Li, J. B. Zhuang, R. R. Cui, Q. Gong, N. Zhao and B. Z. Tang, *ACS Appl. Mater. Interfaces* 2018, **10**, 24249-24257.
8. G. Li, W. Guan, S. Du, D. Zhu, G. Shan, X. Zhu, L. Yan, Z. Su, M. R. Bryce and A. P. Monkman, *Chem. Commun.*, 2015, **51**, 16924-16927.
9. B. Lajin and W. Goessler, *Anal. Chim. Acta*, 2020, **1094**, 11-17.
10. M. L. Tan, M. Zhang, F. Li, F. Maya and M. C. Breadmore, *J. Chromatogr. A*, 2019, **1595**, 215-220.
11. Y.-e. Shi, W. Wang and J. Zhan, *Nano Res.*, 2016, **9**, 2487-2497.
12. L. Peng, L. Hua, W. Wang, Q. Zhou and H. Li, *Sci. Rep.*, 2014, **4**.
13. R. J. Soukup-Hein, J. W. Remsburg, P. K. Dasgupta and D. W. Armstrong, *Anal. Chem.*, 2007, **79**, 7346-7352.
